# Supplementary material for: Structures of chaos in open reaction systems
Source: Royal Society of Chemistry journal article supplement (doi:10.1039/c1cp22496d), 2011-01-01
Supplement: c1cp22496d.pdf [file c1cp22496d.pdf]

## Supplement-Dynamical states

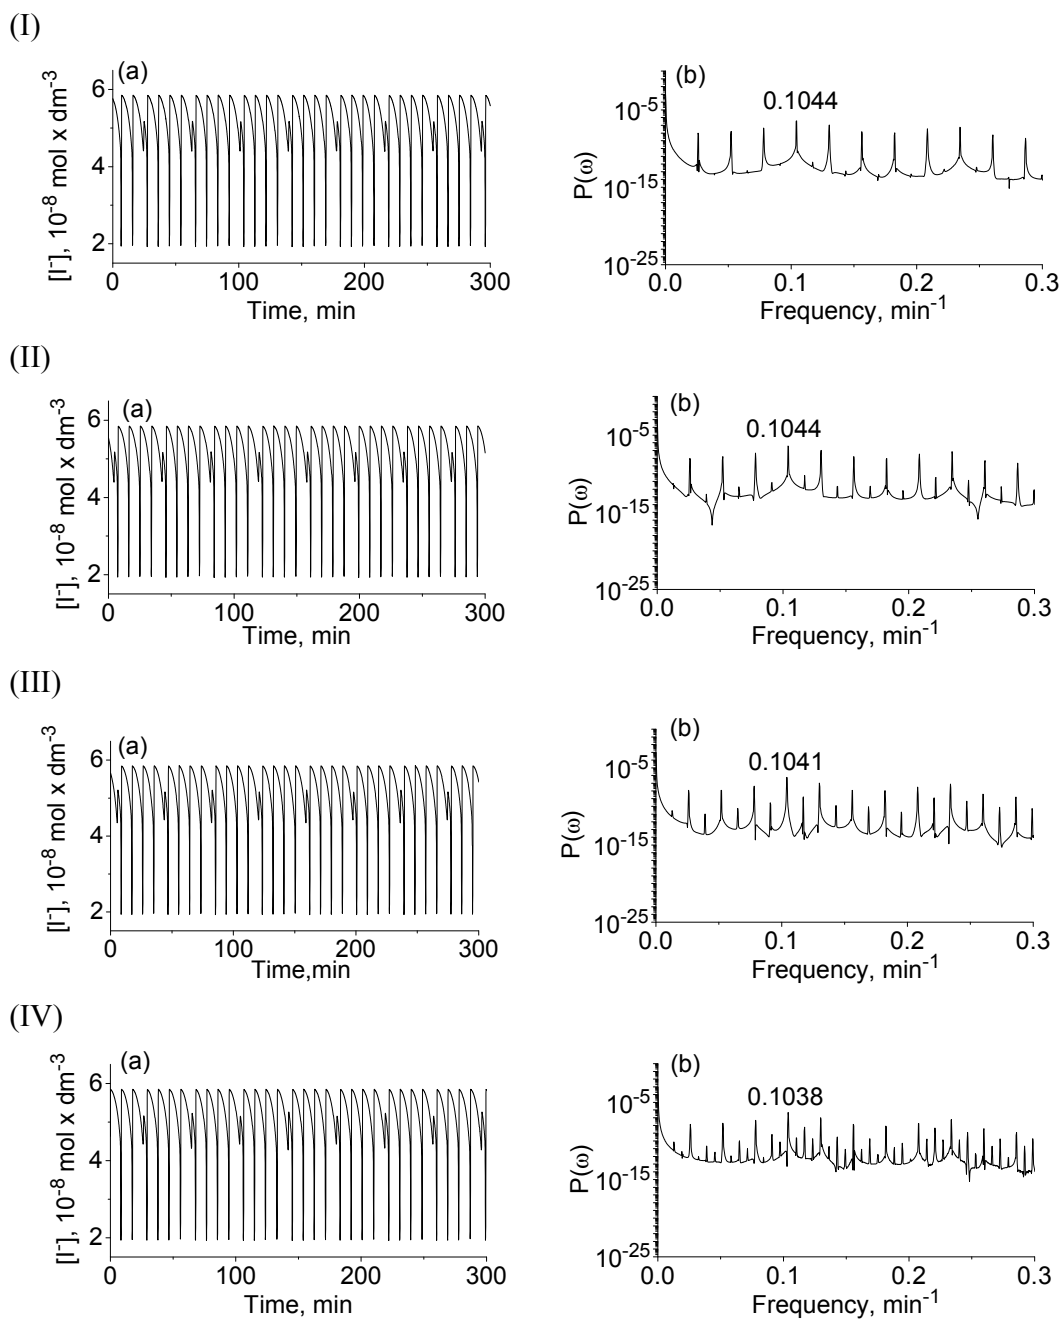

Fig. 1 (a) Time series and (b) power spectra for corresponding flow rates:  
(I)  $j_0 = 4.829050 \times 10^{-3} \text{ min}^{-1}$  ( $[4^1]_{\text{chaos,s}}$  dynamics), (II)  $j_0 = 4.829105 \times 10^{-3} \text{ min}^{-1}$  ( $[(4^1)_2]_{\text{chaos,as}}$  dynamics), (III)  $j_0 = 4.829150 \times 10^{-3} \text{ min}^{-1}$  ( $[(4^1)_2]_{\text{chaos,s}}$  dynamics), (IV)  $j_0 = 4.829230 \times 10^{-3} \text{ min}^{-1}$  ( $[(4^1)_4]_{\text{chaos,as}}$  dynamics).

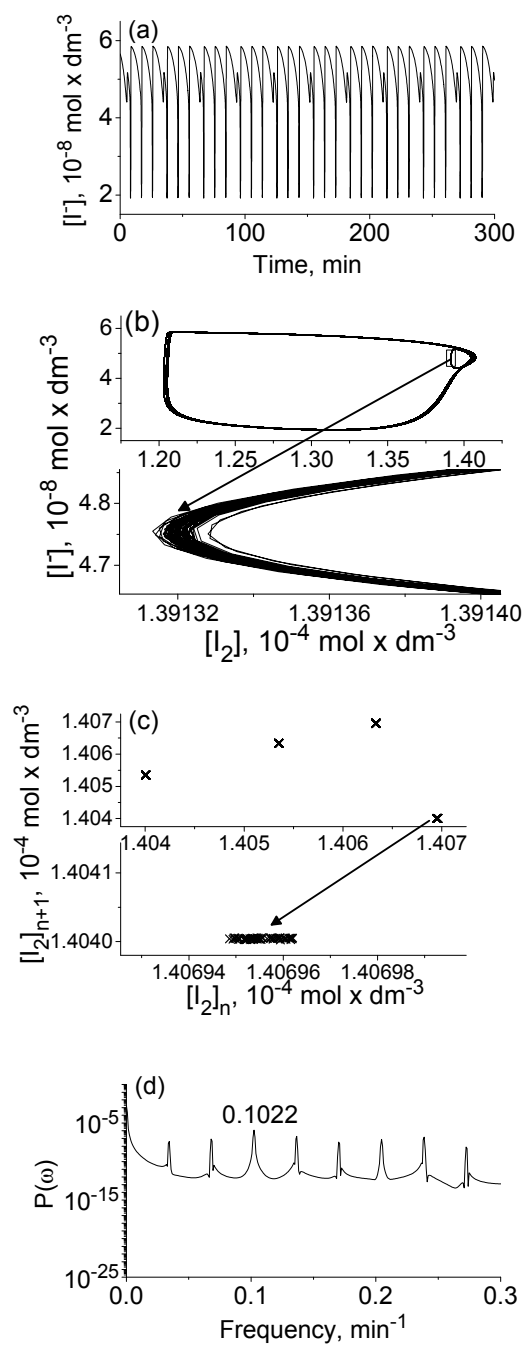

Fig. 2 (a) Time series, (b) attractor, (c) resulting Poincaré map and (d) power spectra corresponding to flow rate  $j_0 = 4.831700 \times 10^{-3} \text{ min}^{-1}$  ( $[3^1]_{\text{chaos,s}}$  dynamics).

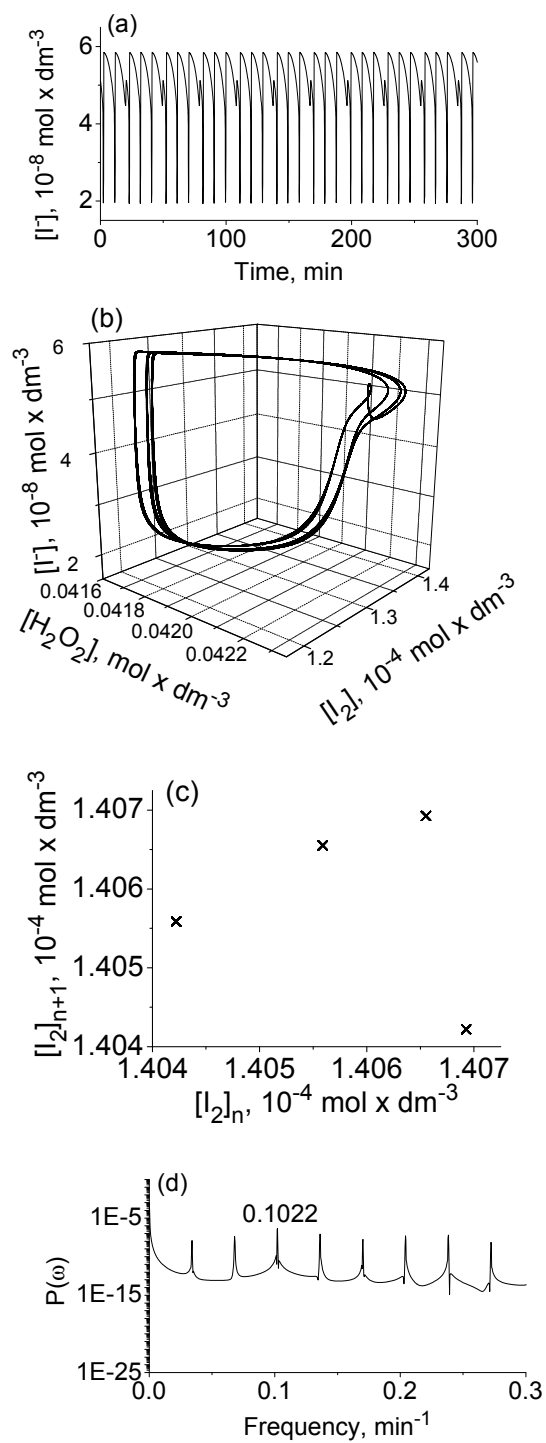

Fig. 3 (a) Time series, (b) attractor, (c) resulting Poincaré map and (d) power spectra corresponding to flow rate  $j_0 = 4.836000 \times 10^{-3} \text{ min}^{-1}$  ( $3^1$  dynamics).
